# Supplementary material for: Ultrasonic vocalizations in house mice depend upon genetic relatedness of mating partners and correlate with subsequent reproductive success
Source: Front Zool. 2020 Apr 3;17:10. doi: 10.1186/s12983-020-00353-1 (PMC7118824; doi:10.1186/s12983-020-00353-1)
Supplement: Supplementary file 2 — Additional file 2. Original dataset containing the raw data and variable definitions used in this article. [file 12983_2020_353_MOESM2_ESM.xlsx]

## Sheet: Raw data
Replicate	Pair_relatedness	Female_estrous	Female_receptivity	Recording_phase	avg.Length_ms	avg.Fmean	Vocal_performance	Vocal_repertoire	us_Sum	s_Sum	f_Sum	d_Sum	up_Sum	u_Sum	ui_Sum	c_Sum	c2_Sum	c3_Sum	c4_Sum	c5_Sum	h_Sum	uh_Sum	uc_Sum	us_Prop	s_Prop	f_Prop	d_Prop	up_Prop	u_Prop	ui_Prop	c_Prop	c2_Prop	c3_Prop	c4_Prop	c5_Prop	h_Prop	uh_Prop	uc_Prop	short_USVs	simple_USVs	complex_USVs	days_in_breeding	LFL	N.pups_1.litter	N.pups_total	N.litters_total	pups_per_litter_total	LFL_70d	N.pups_70d
1	1	diestrous	0	0	18	57.68	2	1	0	0	0	0	0	0	0	0	2	0	0	0	0	0	0	0	0	0	0	0	0	0	0	1	0	0	0	0	0	0	0	0	2	91	24	3	10	4	2.5	24	8
1	1	diestrous	0	1	26.8176	59.5544	17	5	1	0	2	3	10	0	0	1	0	0	0	0	0	0	0	0.0588235	0	0.117647	0.176471	0.588235	0	0	0.0588235	0	0	0	0	0	0	0	1	15	1	91	24	3	10	4	2.5	24	8
2	1	metestrous	0	0	10.6063	60.185	16	5	1	7	3	3	0	0	0	0	2	0	0	0	0	0	0	0.0625	0.4375	0.1875	0.1875	0	0	0	0	0.125	0	0	0	0	0	0	8	6	2	66	35	7	13	2	6.5	35	13
2	1	metestrous	0	1	17.1737	60.3412	19	5	2	3	5	0	8	0	1	0	0	0	0	0	0	0	0	0.105263	0.157895	0.263158	0	0.421053	0	0.0526316	0	0	0	0	0	0	0	0	5	14	0	66	35	7	13	2	6.5	35	13
3	1	diestrous	0	0	31.8537	75.6757	251	12	15	18	24	17	132	18	2	4	6	5	0	0	0	3	7	0.059761	0.0717131	0.0956175	0.0677291	0.525896	0.0717131	0.00796813	0.0159363	0.0239044	0.0199203	0	0	0	0.0119522	0.0278884	33	193	15	77	98	0	0	0	0	70	0
3	1	diestrous	0	1	20.3421	72.3662	19	7	2	3	8	1	2	0	0	0	1	0	0	0	0	2	0	0.105263	0.157895	0.421053	0.0526316	0.105263	0	0	0	0.0526316	0	0	0	0	0.105263	0	5	11	1	77	98	0	0	0	0	70	0
4	1	metestrous	0	0	30.0495	60.8402	325	13	5	20	19	16	48	3	30	4	70	91	4	0	0	3	12	0.0153846	0.0615385	0.0584615	0.0492308	0.147692	0.00923077	0.0923077	0.0123077	0.215385	0.28	0.0123077	0	0	0.00923077	0.0369231	25	116	169	60	35	3	11	2	5.5	35	11
4	1	metestrous	0	1	24.0717	60.8324	468	14	35	50	57	53	84	1	98	5	33	26	1	0	1	1	23	0.0747863	0.106838	0.121795	0.113248	0.179487	0.00213675	0.209402	0.0106838	0.0705128	0.0555556	0.00213675	0	0.00213675	0.00213675	0.0491453	85	293	66	60	35	3	11	2	5.5	35	11
5	1	estrous	1	0	17.275	36.63	13	4	0	1	0	0	0	0	0	0	1	2	0	0	0	0	9	0	0.0769231	0	0	0	0	0	0	0.0769231	0.153846	0	0	0	0	0.692308	1	0	3	50	21	12	18	2	9	21	18
5	1	estrous	1	1	18.1499	71.3688	376	12	28	78	112	20	86	6	17	1	15	3	0	0	0	3	7	0.0744681	0.207447	0.297872	0.0531915	0.228723	0.0159574	0.0452128	0.00265957	0.0398936	0.00797872	0	0	0	0.00797872	0.018617	106	241	19	50	21	12	18	2	9	21	18
6	2	diestrous	0	0	8.97037	68.3874	28	8	4	11	2	1	3	0	0	0	1	0	0	0	0	5	1	0.142857	0.392857	0.0714286	0.0357143	0.107143	0	0	0	0.0357143	0	0	0	0	0.178571	0.0357143	15	6	1	70	22	4	16	3	5.33333	22	16
6	2	diestrous	0	1	33.2602	65.2897	493	10	3	7	38	3	346	50	21	15	7	3	0	0	0	0	0	0.00608519	0.0141988	0.0770791	0.00608519	0.701826	0.10142	0.0425963	0.030426	0.0141988	0.00608519	0	0	0	0	0	10	458	25	70	22	4	16	3	5.33333	22	16
7	1	estrous	1	0	33.0051	64.4361	527	10	0	16	78	25	344	28	10	1	21	2	0	0	0	2	0	0	0.0303605	0.148008	0.0474383	0.652751	0.0531309	0.0189753	0.00189753	0.0398482	0.00379507	0	0	0	0.00379507	0	16	485	24	49	21	9	17	2	8.5	21	17
7	1	estrous	1	1	38.0138	64.312	1002	13	1	15	168	25	604	35	44	9	79	16	2	1	0	3	0	0.000998004	0.0149701	0.167665	0.0249501	0.602794	0.0349301	0.0439122	0.00898204	0.0788423	0.0159681	0.00199601	0.000998004	0	0.00299401	0	16	876	107	49	21	9	17	2	8.5	21	17
8	1	metestrous	0	0	13.4488	51.2674	57	10	6	11	3	3	1	0	0	0	12	2	2	0	0	1	16	0.105263	0.192982	0.0526316	0.0526316	0.0175439	0	0	0	0.210526	0.0350877	0.0350877	0	0	0.0175439	0.280702	17	7	16	49	22	8	15	2	7.5	22	15
8	1	metestrous	0	1	27.878	67.949	242	11	3	20	60	18	72	4	38	10	15	1	0	0	0	0	1	0.0123967	0.0826446	0.247934	0.0743802	0.297521	0.0165289	0.157025	0.0413223	0.0619835	0.00413223	0	0	0	0	0.00413223	23	192	26	49	22	8	15	2	7.5	22	15
9	1	metestrous	0	0	36.0727	72.8939	386	11	2	19	44	18	236	15	24	8	17	0	0	0	0	2	1	0.00518135	0.0492228	0.11399	0.0466321	0.611399	0.0388601	0.0621762	0.0207254	0.0440415	0	0	0	0	0.00518135	0.00259067	21	337	25	49	21	4	13	3	4.33333	21	13
9	1	metestrous	0	1	31.2132	68.3133	109	10	2	8	15	6	55	6	11	1	2	0	0	0	0	0	3	0.0183486	0.0733945	0.137615	0.0550459	0.504587	0.0550459	0.100917	0.00917431	0.0183486	0	0	0	0	0	0.0275229	10	93	3	49	21	4	13	3	4.33333	21	13
10	1	proestrous	1	0	23	41.7	2	2	0	0	0	0	0	0	0	0	1	0	0	0	0	0	1	0	0	0	0	0	0	0	0	0.5	0	0	0	0	0	0.5	0	0	1	49	21	8	27	3	9	21	27
10	1	proestrous	1	1	34.7898	61.6362	931	12	9	39	120	37	507	51	119	21	24	1	0	0	0	1	2	0.00966702	0.0418904	0.128894	0.0397422	0.544576	0.0547798	0.12782	0.0225564	0.0257787	0.00107411	0	0	0	0.00107411	0.00214823	48	834	46	49	21	8	27	3	9	21	27
11	1	estrous	1	0	11.3727	42.9044	16	5	1	5	4	0	0	0	0	0	1	0	0	0	0	0	5	0.0625	0.3125	0.25	0	0	0	0	0	0.0625	0	0	0	0	0	0.3125	6	4	1	83	20	1	16	4	4	20	9
11	1	estrous	1	1	28.2077	68.2323	510	11	5	24	93	13	319	5	21	7	19	2	0	0	0	0	2	0.00980392	0.0470588	0.182353	0.0254902	0.62549	0.00980392	0.0411765	0.0137255	0.0372549	0.00392157	0	0	0	0	0.00392157	29	451	28	83	20	1	16	4	4	20	9
12	1	estrous	1	0	8.11667	82.4617	12	4	2	1	0	0	0	0	0	0	0	0	0	0	0	3	6	0.166667	0.0833333	0	0	0	0	0	0	0	0	0	0	0	0.25	0.5	3	0	0	48	21	7	12	2	6	21	12
12	1	estrous	1	1	23.5525	56.4733	41	8	1	2	7	4	24	0	0	1	0	0	0	0	1	0	1	0.0243902	0.0487805	0.170732	0.097561	0.585366	0	0	0.0243902	0	0	0	0	0.0243902	0	0.0243902	3	35	2	48	21	7	12	2	6	21	12
13	1	diestrous	0	0	12.3529	65.6127	19	8	2	3	1	4	1	0	0	0	2	0	0	0	0	4	2	0.105263	0.157895	0.0526316	0.210526	0.0526316	0	0	0	0.105263	0	0	0	0	0.210526	0.105263	5	6	2	58	29	9	19	2	9.5	29	19
13	1	diestrous	0	1	25.8	60.45	2	2	0	0	0	0	1	0	0	0	1	0	0	0	0	0	0	0	0	0	0	0.5	0	0	0	0.5	0	0	0	0	0	0	0	1	1	58	29	9	19	2	9.5	29	19
14	1	proestrous	1	0	21.4652	59.7138	119	10	1	13	9	2	80	1	6	2	0	0	0	0	0	1	4	0.00840336	0.109244	0.0756303	0.0168067	0.672269	0.00840336	0.0504202	0.0168067	0	0	0	0	0	0.00840336	0.0336134	14	98	2	79	23	4	9	2	4.5	23	4
14	1	proestrous	1	1	21.672	60.0245	655	10	9	67	94	35	322	1	105	4	16	0	0	0	0	0	2	0.0137405	0.10229	0.143511	0.0534351	0.491603	0.00152672	0.160305	0.00610687	0.0244275	0	0	0	0	0	0.00305344	76	557	20	79	23	4	9	2	4.5	23	4
15	1	diestrous	0	0	11.9727	64.7662	72	11	5	12	1	6	1	0	3	0	10	1	1	0	0	15	17	0.0694444	0.166667	0.0138889	0.0833333	0.0138889	0	0.0416667	0	0.138889	0.0138889	0.0138889	0	0	0.208333	0.236111	17	11	12	51	22	11	21	2	10.5	22	21
15	1	diestrous	0	1	37.639	65.8083	815	10	6	13	145	42	437	9	152	3	6	0	0	0	0	2	0	0.00736196	0.0159509	0.177914	0.0515337	0.536196	0.0110429	0.186503	0.00368098	0.00736196	0	0	0	0	0.00245399	0	19	785	9	51	22	11	21	2	10.5	22	21
16	2	estrous	1	0	19	37.3	3	2	0	0	0	0	0	0	0	0	1	0	0	0	0	0	2	0	0	0	0	0	0	0	0	0.333333	0	0	0	0	0	0.666667	0	0	1	89	62	9	9	1	9	62	9
16	2	estrous	1	1	21.0278	61.1795	54	8	3	11	9	0	26	1	2	0	1	0	0	0	1	0	0	0.0555556	0.203704	0.166667	0	0.481481	0.0185185	0.037037	0	0.0185185	0	0	0	0.0185185	0	0	14	38	2	89	62	9	9	1	9	62	9
17	2	diestrous	0	0	13.3561	61.4087	70	10	4	16	1	3	1	1	0	1	8	0	0	0	0	6	29	0.0571429	0.228571	0.0142857	0.0428571	0.0142857	0.0142857	0	0.0142857	0.114286	0	0	0	0	0.0857143	0.414286	20	6	9	49	21	8	16	2	8	21	16
17	2	diestrous	0	1	13.1682	62.4483	26	7	6	3	4	0	7	0	1	0	0	0	0	0	0	1	4	0.230769	0.115385	0.153846	0	0.269231	0	0.0384615	0	0	0	0	0	0	0.0384615	0.153846	9	12	0	49	21	8	16	2	8	21	16
18	2	diestrous	0	0	12	49.6753	29	8	1	9	1	1	2	0	0	0	4	2	0	0	0	0	9	0.0344828	0.310345	0.0344828	0.0344828	0.0689655	0	0	0	0.137931	0.0689655	0	0	0	0	0.310345	10	4	6	49	23	10	19	2	9.5	23	19
18	2	diestrous	0	1	22.8459	60.8469	830	10	11	70	336	50	344	5	8	1	4	0	0	0	0	1	0	0.013253	0.0843373	0.404819	0.060241	0.414458	0.0060241	0.00963855	0.00120482	0.00481928	0	0	0	0	0.00120482	0	81	743	5	49	23	10	19	2	9.5	23	19
19	2	proestrous	1	0	10.7	62.0092	42	8	6	11	1	1	2	0	0	0	6	0	0	0	0	5	10	0.142857	0.261905	0.0238095	0.0238095	0.047619	0	0	0	0.142857	0	0	0	0	0.119048	0.238095	17	4	6	84	46	3	3	1	3	46	3
19	2	proestrous	1	1	15.8967	60.4786	62	8	6	16	9	0	27	0	1	0	1	0	0	0	0	1	1	0.0967742	0.258065	0.145161	0	0.435484	0	0.016129	0	0.016129	0	0	0	0	0.016129	0.016129	22	37	1	84	46	3	3	1	3	46	3
20	2	proestrous	1	0	8.19048	43.1125	40	7	8	3	5	0	1	0	0	0	2	0	0	0	0	2	19	0.2	0.075	0.125	0	0.025	0	0	0	0.05	0	0	0	0	0.05	0.475	11	6	2	70	91	0	0	0	0	70	0
20	2	proestrous	1	1	25.5934	59.0003	1696	12	14	106	593	98	761	15	65	9	26	4	0	0	3	0	2	0.00825472	0.0625	0.349646	0.057783	0.448703	0.00884434	0.0383255	0.0053066	0.0153302	0.00235849	0	0	0.00176887	0	0.00117925	120	1532	42	70	91	0	0	0	0	70	0
21	2	proestrous	1	0	6.05	N/A	2	2	1	1	0	0	0	0	0	0	0	0	0	0	0	0	0	0.5	0.5	0	0	0	0	0	0	0	0	0	0	0	0	0	2	0	0	70	91	0	0	0	0	70	0
21	2	proestrous	1	1	19.184	58.4832	708	10	32	113	134	30	316	5	53	5	17	3	0	0	0	0	0	0.0451977	0.159605	0.189266	0.0423729	0.446328	0.00706215	0.0748588	0.00706215	0.0240113	0.00423729	0	0	0	0	0	145	538	25	70	91	0	0	0	0	70	0
22	2	estrous	1	0	7.58929	42.0487	45	6	15	6	0	0	0	0	0	0	5	0	1	0	1	0	17	0.333333	0.133333	0	0	0	0	0	0	0.111111	0	0.0222222	0	0.0222222	0	0.377778	21	0	7	48	24	5	13	2	6.5	24	13
22	2	estrous	1	1	17.5018	62.7618	114	8	5	14	33	4	49	0	5	0	3	0	0	0	0	1	0	0.0438596	0.122807	0.289474	0.0350877	0.429825	0	0.0438596	0	0.0263158	0	0	0	0	0.00877193	0	19	91	3	48	24	5	13	2	6.5	24	13
23	2	estrous	1	0	12.3833	50.7755	40	6	8	10	0	0	0	0	0	4	1	0	0	0	0	1	16	0.2	0.25	0	0	0	0	0	0.1	0.025	0	0	0	0	0.025	0.4	18	0	5	83	34	1	1	1	1	34	1
23	2	estrous	1	1	29.737	61.769	535	12	12	23	145	22	281	21	9	4	5	0	0	0	2	3	8	0.0224299	0.0429907	0.271028	0.0411215	0.525234	0.0392523	0.0168224	0.00747664	0.00934579	0	0	0	0.00373832	0.00560748	0.0149533	35	478	11	83	34	1	1	1	1	34	1
24	1	estrous	1	0	8.08387	54.3979	39	6	5	16	0	3	0	0	0	0	5	0	0	0	0	2	8	0.128205	0.410256	0	0.0769231	0	0	0	0	0.128205	0	0	0	0	0.0512821	0.205128	21	3	5	59	30	6	11	2	5.5	30	11
24	1	estrous	1	1	24.3961	51.8139	155	10	3	12	26	9	85	1	13	1	4	0	0	0	1	0	0	0.0193548	0.0774194	0.167742	0.0580645	0.548387	0.00645161	0.083871	0.00645161	0.0258065	0	0	0	0.00645161	0	0	15	134	6	59	30	6	11	2	5.5	30	11
25	2	estrous	1	0	9.15	41.25	11	5	2	4	0	0	0	0	0	0	0	1	0	0	1	0	3	0.181818	0.363636	0	0	0	0	0	0	0	0.0909091	0	0	0.0909091	0	0.272727	6	0	2	69	90	0	0	0	0	70	0
25	2	estrous	1	1	9.83333	75.93	4	4	1	1	0	0	0	0	0	0	0	0	0	0	0	1	1	0.25	0.25	0	0	0	0	0	0	0	0	0	0	0	0.25	0.25	2	0	0	69	90	0	0	0	0	70	0
26	2	diestrous	0	0	8.88333	60.665	14	6	5	4	1	1	1	0	0	0	0	0	0	0	0	0	2	0.357143	0.285714	0.0714286	0.0714286	0.0714286	0	0	0	0	0	0	0	0	0	0.142857	9	3	0	48	22	6	13	2	6.5	22	13
26	2	diestrous	0	1	4.1	39.7	5	3	2	2	0	0	0	0	0	0	0	0	0	0	0	0	1	0.4	0.4	0	0	0	0	0	0	0	0	0	0	0	0	0.2	4	0	0	48	22	6	13	2	6.5	22	13
[truncated: 2 more columns]

## Sheet: Variable definitions
Legend
Column header	Definition
Replicate	Replicate number for each breeding pair
Pair_relatedness	Genetic relatedness of males and females in a preeding pair; 1 = unrelated, 2 = related
Female_Estrous	Female estrous state at the recording day
Female_receptivity	Female receptivity at the recording day; 0 = unreceptive, 1 = receptive
Recording_phase	Recording phase; 0 = 10min introduction phase, 1 = 10 min interaction phase
avg.Length_ms	Mean length of USVs in each phase; [ms]
avg.Fmean	Grand mean frequency of USVs in each phase; [kHz]
Vocal_performance	Total number of USVs emitted in each phase
Vocal_repertoire	Total number of different syllable types used in each phase
us_Sum	Total number of the respective syllable type emitted during each phase
s_Sum
f_Sum
d_Sum
up_Sum
u_Sum
ui_Sum
c_Sum
c2_Sum
c3_Sum
c4_Sum
c5_Sum
h_Sum
uh_Sum
uc_Sum
us_Prop	Proportion of the respective syllable type used during each phase (number of syllables in each type/total number of USVs emitted)
s_Prop
f_Prop
d_Prop
up_Prop
u_Prop
ui_Prop
c_Prop
c2_Prop
c3_Prop
c4_Prop
c5_Prop
h_Prop
uh_Prop
uc_Prop
short_USVs	Total number of short USVs (combined s, us)
simple_USVs	Total number of simple USVs (combined f, d, up, u, ui)
complex_USVs	Total number of complex USVs (combined c, c2, c3, c4, c5, h)
days_in_breeding	Toal number of days mice were kept in pairs
LFL	Latency [d] until the first litter was born (or the time kept in pairs + 21d, if mice did not reproduce)
N.pups_1.litter	Number of offspring in the first litter
N.pups_total	Total number of offspring delivered during the entire breeding period
N.litters_total	Total number of litters delivered during the entire breeding period
pups_per_litter_total	Ratio of the number of pups delivered per litter during the entire breeding period
LFL_70d	Latency [d] until the first litter was born within a maximum of 70d
N.pups_70d	Number of offspring delivered within 70 days
N.litters_70d	Number of litters delivered within 70 days
pups_per_litter_70d	Ratio of the number of pups delivered per litter within 70 days
